# Supplementary material for: Hip Surveillance and Management of Hip Displacement in Children with Cerebral Palsy: Clinical and Ethical Dilemmas
Source: MDPI journal article supplement (doi:10.3390/jcm12041651), 2023-02-19
Supplement: s1 [file s1]

## The Melbourne Cerebral Palsy Hip Classification Scale (Expanded and Revised)

|                                                                                     |                                                                                     |                                                                                                                                                                                                                                                                                                                                                                                                                                                           |
|-------------------------------------------------------------------------------------|-------------------------------------------------------------------------------------|-----------------------------------------------------------------------------------------------------------------------------------------------------------------------------------------------------------------------------------------------------------------------------------------------------------------------------------------------------------------------------------------------------------------------------------------------------------|
|    |    | <p><b>Grade 1: Normal Hip – Migration Percentage &lt;10%</b></p> <ol style="list-style-type: none"> <li>1. Shenton's arch intact</li> <li>2. Femoral head round (within 2mm using Mose circles)</li> <li>3. Acetabulum – normal acetabular development with a normal horizontal sourcil, an everted lateral margin and normal tear drop development</li> <li>4. Pelvic obliquity &lt;5°</li> <li>5. No degenerative change, no pain</li> </ol>            |
|    |    | <p><b>Grade 2: Near Normal Hip – Migration Percentage ≥10% ≤15%</b></p> <ol style="list-style-type: none"> <li>1. Shenton's arch intact</li> <li>2. Femoral head round or almost round</li> <li>3. Acetabulum – normal or near normal development</li> <li>4. Pelvic obliquity &lt;5°</li> <li>5. Low risk of degenerative change, usually pain free</li> </ol>                                                                                           |
|    |    | <p><b>Grade 3: Dysplastic Hip – Migration Percentage &gt;15% ≤30%</b></p> <ol style="list-style-type: none"> <li>1. Shenton's arch intact or broken by ≤5mm</li> <li>2. Femoral head round or mildly flattened</li> <li>3. Acetabulum normal or mildly dysplastic including blunting of the acetabular margin and a widened tear drop</li> <li>4. Pelvic obliquity &lt;10°</li> <li>5. Low risk of degenerative change, occasionally mild pain</li> </ol> |
|   |   | <p><b>Grade 4: Dysplasia With Mild Subluxation – Migration Percentage &gt;30% &lt;60%</b></p> <ol style="list-style-type: none"> <li>1. Shenton's arch broken by &gt;5mm</li> <li>2. Femoral head some flattening – Appendix 1</li> <li>3. Acetabulum dysplastic – Appendix 2</li> <li>4. Pelvic obliquity variable – Appendix 3</li> <li>5. Risk of degenerative change, pain variable</li> </ol>                                                        |
|  |  | <p><b>Grade 5: Moderate to Severe Subluxation – Migration Percentage ≥60% &lt;100%</b></p> <ol style="list-style-type: none"> <li>1. Shenton's arch broken by &gt;10mm</li> <li>2. Femoral head variable deformity – Appendix 1</li> <li>3. Acetabulum variable deformity – Appendix 2</li> <li>4. Pelvic obliquity variable – Appendix 3</li> <li>5. Degenerative change frequent, pain frequent</li> </ol>                                              |
|  |  | <p><b>Grade 6: Dislocated Hip – Migration Percentage ≥100%</b></p> <ol style="list-style-type: none"> <li>1. Shenton's arch completely disrupted</li> <li>2. Femoral head variable deformity – Appendix 1</li> <li>3. Acetabulum variable deformity – Appendix 2</li> <li>4. Pelvic obliquity variable – Appendix 3</li> <li>5. Degenerative change frequent, pain frequent</li> </ol>                                                                    |
|  |  | <p><b>Grade 7: Salvage Surgery</b></p> <ol style="list-style-type: none"> <li>1. Valgus osteotomy</li> <li>2. Arthrodesis</li> <li>3. Excision arthroplasty (Castle) ± valgus osteotomy (McHale)</li> <li>4. Replacement arthroplasty</li> <li>5. Pain relief following salvage surgery: variable</li> </ol>                                                                                                                                              |
